# Supplementary material
Source: PubMed Central journal article supplement (PMC2747050)
Supplement: NIHMS136880-supplement-1_si_001.pdf [file NIHMS136880-supplement-1_si_001.pdf]

# Supporting Information

## High-Throughput Profiling of Formalin-Fixed Paraffin- Embedded Tissue Using Parallel Electrophoresis and Matrix-Assisted Laser Desorption Ionization Mass Spectrometry

*Hans-Rudolf Aerni, Dale S. Cornett, Richard M. Caprioli*

Mass Spectrometry Research Center, Departments of Chemistry and Biochemistry, Vanderbilt University, 465 21st Avenue South, Medical Research Building 3, Room 9160, Nashville, Tennessee 37232-8575

## Contents

**Table S-1.** Parameters for database searching and identification using Myrimatch and IdPicker software.

**Table S-2.** IdPicker report showing the results from a LC MALDI run from mouse liver tissue.

**Table S-1.** Parameters for database searching and identification using MyriMatch and IdPicker software.

| <b>Identification</b>             |                                |
|-----------------------------------|--------------------------------|
| <b>Parameter</b>                  | <b>Value</b>                   |
| Software name                     | MyriMatch                      |
| Software version                  | 1.2.9                          |
| AdjustPrecursorMass               | 1                              |
| CalculateRelativeScores           | 0                              |
| ClassSizeMultiplier               | 2                              |
| CleavageRules                     | [ [M K R . . ]                 |
| ComplementMzTolerance             | 0.5                            |
| DeisotopingMode                   | 0                              |
| DuplicateSpectra                  | 1                              |
| DynamicMods                       | M * 15.994915 (Q! % -17.026549 |
| EndProteinIndex                   | -1                             |
| EndSpectraScanNum                 | -1                             |
| FragmentMzTolerance               | 0.5                            |
| IsotopeMzTolerance                | 0.25                           |
| MakeScoreHistograms               | 0                              |
| MakeSpectrumGraphs                | 0                              |
| MaxDynamicMods                    | 2                              |
| MaxFragmentChargeState            | 1                              |
| MaxPrecursorAdjustment            | 1.008665                       |
| MaxResults                        | 5                              |
| MaxScoreHistogramValues           | 100                            |
| MaxSequenceMass                   | 10000                          |
| MinCandidateLength                | 5                              |
| MinPrecursorAdjustment            | -1.008665                      |
| MinResultScore                    | 0                              |
| MinSequenceMass                   | 0                              |
| NumBatches                        | 50                             |
| NumChargeStates                   | 3                              |
| NumIntensityClasses               | 3                              |
| NumMaxMissedCleavages             | -1                             |
| NumMinTerminiCleavages            | 1                              |
| NumMzFidelityClasses              | 3                              |
| NumScoreHistogramBins             | 100                            |
| NumSearchBestAdjustments          | 3                              |
| OutputSuffix                      |                                |
| PeakCounts: 1stQuartile: Filtered | 116                            |
| PeakCounts: 1stQuartile: Original | 137                            |
| PeakCounts: 2ndQuartile: Filtered | 137                            |
| PeakCounts: 2ndQuartile: Original | 159                            |
| PeakCounts: 3rdQuartile: Filtered | 154                            |
| PeakCounts: 3rdQuartile: Original | 176                            |
| PeakCounts: Mean: Filtered        | 132                            |

| <b>Identification</b>         |                                                                                 |
|-------------------------------|---------------------------------------------------------------------------------|
| PeakCounts: Mean: Original    | 153                                                                             |
| PeakCounts: Min/Max: Filtered | 17 / 183                                                                        |
| PeakCounts: Min/Max: Original | 32 / 200                                                                        |
| PrecursorAdjustmentStep       | 1.008665                                                                        |
| PrecursorMzTolerance          | 0.5                                                                             |
| PreferIntenseComplements      | 1                                                                               |
| ProteinDatabase               | /hactar/fasta/20080430-IPIMouse342-Cntms-reverse.fasta                          |
| ProteinSampleSize             | 100                                                                             |
| ScoreHistogramHeight          | 600                                                                             |
| ScoreHistogramWidth           | 800                                                                             |
| SearchStats: Nodes            | 32                                                                              |
| SearchStats: Overall          | 188776 proteins; 787196833 candidates; 317543051 queries; 559060514 comparisons |
| SearchTime: Duration          | 141.7816 seconds                                                                |
| StartProteinIndex             | 0                                                                               |
| StartSpectraScanNum           | 0                                                                               |
| StaticMods                    | C 57.021464                                                                     |
| StatusUpdateFrequency         | 5                                                                               |
| ThreadCountMultiplier         | 10                                                                              |
| TicCutoffPercentage           | 0.95                                                                            |
| UseAvgMassOfSequences         | 0                                                                               |
| UseChargeStateFromMS          | 1                                                                               |
| UseMultipleProcessors         | 1                                                                               |
| UseSmartPlusThreeModel        | 1                                                                               |
| WorkingDirectory              | /hactar/data/unorganized/20080717-Aerni-Mouse-Liver                             |
| <b>Validation</b>             |                                                                                 |
| Parameter                     | Value                                                                           |
| Software name                 | idpQonvert                                                                      |
| Software version              | 2.1.4                                                                           |
| DecoyPrefix                   | rev_                                                                            |
| HasDecoyDatabase              | 1                                                                               |
| MaxFDR                        | 0.05                                                                            |
| MaxResultRank                 | 1                                                                               |
| NormalizeSearchScores         | 0                                                                               |
| NumChargeStates               | 3                                                                               |
| OptimizeScorePermutations     | 200                                                                             |
| OptimizeScoreWeights          | 0                                                                               |
| OutputSuffix                  |                                                                                 |
| PreserveInputHierarchy        | 0                                                                               |
| ProteinDatabase               | c:\Éliburdatabase\80430-IPIMouse342-Cntms-reverse.fasta                         |
| SearchScoreWeights            | mvh 1 xcorr 1 expect -1 ionscore 1                                              |
| StatusUpdateFrequency         | 5                                                                               |
| WorkingDirectory              |                                                                                 |
| WriteQonversionDetails        | 0                                                                               |

| <b>Presentation/filtration</b> |                   |
|--------------------------------|-------------------|
| <b>Parameter</b>               | <b>Value</b>      |
| Software name                  | idpReport         |
| Software version               | 2.1.1 (4/8/2008)  |
| MinAdditionalPeptides          | 1                 |
| GenerateBipartiteGraphs        | FALSE             |
| ModsAreDistinctByDefault       | TRUE              |
| DistinctModsOverride           |                   |
| IndistinctModsOverride         |                   |
| RawSourceHostURL               | http://localhost/ |
| RawSourceExtension             | .*                |
| RawSourcePath                  |                   |
| MaxFDR                         | 0.05              |
| MaxResultRank                  | 1                 |
| MinPeptideLength               | 5                 |
| MinDistinctPeptides            | 1                 |
| MaxAmbiguousIds                | 2                 |
| AllowSharedSourceNames         | TRUE              |

**Table S-2.** IdPicker report showing the results from a LC MALDI run from mouse liver tissue.

| Peptide                            | Decoy | Mass of unmodified peptide | Protein                     |
|------------------------------------|-------|----------------------------|-----------------------------|
| AFAISGPFNVQFLVK                    | No    | 1636.887                   | IPI00111908.8               |
| EIEYEVVR                           | No    | 1035.524                   | IPI00111908.8               |
| FLEEATR                            | No    | 864.4341                   | IPI00111908.8               |
| FLGVAEQLHNEGFK                     | No    | 1587.794                   | IPI00111908.8               |
| FVHDNYVIR                          | No    | 1161.593                   | IPI00111908.8               |
| GILIGIQQSFR                        | No    | 1230.708                   | IPI00111908.8               |
| GILIGIQQSFRPR                      | No    | 1483.862                   | IPI00111908.8               |
| GQNQPVLNITNR                       | No    | 1352.716                   | IPI00111908.8               |
| GYSFGHPSSVAGEVVFNTGLGGYPEALTDPAYK  | No    | 3386.598                   | IPI00111908.8               |
| IAPSFAVESM(15.9949)EDALK           | No    | 1606.78                    | IPI00111908.8               |
| QADAVYFLPITPQFVTEVIK               | No    | 2278.214                   | IPI00111908.8               |
| Q(-17.0265)ADAVYFLPITPQFVTEVIK     | No    | 2278.214                   | IPI00111908.8               |
| RLPTLEQPIIPSDYVAIK                 | No    | 2052.151                   | IPI00111908.8               |
| SIFSAVLDELK                        | No    | 1220.654                   | IPI00111908.8               |
| SLFHVR                             | No    | 821.4184                   | IPI00111908.8               |
| VPAIYGVDTR                         | No    | 1089.582                   | IPI00111908.8               |
| DFTPAAQAAFQK                       | No    | 1293.624                   | IPI00762198.2/IPI00553333.2 |
| LHVDPENFR                          | No    | 1125.557                   | IPI00762198.2/IPI00553333.2 |
| LLGNM(15.9949)IVIVLGHHLGK          | No    | 1713.002                   | IPI00762198.2/IPI00553333.2 |
| LLVVYPWTQR                         | No    | 1273.718                   | IPI00762198.2/IPI00553333.2 |
| VITAFNDGLNHLDLTK                   | No    | 1755.905                   | IPI00762198.2/IPI00553333.2 |
| YFDSFGDLSSASAIM(15.9949)GNAK       | No    | 1979.882                   | IPI00762198.2/IPI00553333.2 |
| VNADEVGGEALGR                      | No    | 1285.626                   | IPI00762198.2               |
| VNSDEVGGEALGR                      | No    | 1301.621                   | IPI00553333.2               |
| AGFAGDDAPR                         | No    | 975.4409                   | IPI00110850.1               |
| AVFPSIVGR                          | No    | 944.5444                   | IPI00110850.1               |
| AVFPSIVGRPR                        | No    | 1197.698                   | IPI00110850.1               |
| GYSFTTTAER                         | No    | 1131.52                    | IPI00110850.1               |
| QEYDESGPSIVHR                      | No    | 1515.695                   | IPI00110850.1               |
| Q(-17.0265)EYDESGPSIVHR            | No    | 1515.695                   | IPI00110850.1               |
| SYELPDGQVITIGNER                   | No    | 1789.885                   | IPI00110850.1               |
| VAPEEHPVLLTEAPLNPK                 | No    | 1953.046                   | IPI00110850.1               |
| FNSANEDNVTQVR                      | No    | 1492.69                    | IPI00231742.5               |
| FSTVAGESGSADTVRDPR                 | No    | 1850.876                   | IPI00231742.5               |
| GAGAFGYFEVTHDITR                   | No    | 1739.827                   | IPI00231742.5               |
| GPLLVQDVVFTDEM(15.9949)AHFDR       | No    | 2188.062                   | IPI00231742.5               |
| LAQEDPDYGLR                        | No    | 1275.609                   | IPI00231742.5               |
| LFAYPDTHR                          | No    | 1118.551                   | IPI00231742.5               |
| NFTDVHPDYGAR                       | No    | 1390.626                   | IPI00231742.5               |
| GIYETPAGTILYHAHLDIEAFTM(15.9949)DR | No    | 2833.374                   | IPI00134746.5               |
| GQVYILGR                           | No    | 904.5131                   | IPI00134746.5               |
| MPEFYNR                            | No    | 955.4222                   | IPI00134746.5               |
| NQAPPGLYTK                         | No    | 1087.555                   | IPI00134746.5               |

| Peptide                        | Decoy | Mass of unmodified peptide | Protein       |
|--------------------------------|-------|----------------------------|---------------|
| Q(-17.0265)HGIIPIVTPK          | No    | 1185.676                   | IPI00134746.5 |
| RQVEIAQR                       | No    | 998.5622                   | IPI00134746.5 |
| AHGGYSVFAGVGER                 | No    | 1405.674                   | IPI00468481.2 |
| AIAELGIYPAVDPLDSTSR            | No    | 1987.026                   | IPI00468481.2 |
| DQEGQDVLLFIDNIFR               | No    | 1920.958                   | IPI00468481.2 |
| IM(15.9949)DPNIVGNEHYDVAR      | No    | 1841.873                   | IPI00468481.2 |
| LVLEVAQHLGESTVR                | No    | 1649.91                    | IPI00468481.2 |
| VALTGLTVAEYFR                  | No    | 1438.782                   | IPI00468481.2 |
| DGFNPAHVEAGLYGSR               | No    | 1688.791                   | IPI00623845.3 |
| LAGQIFLGGSSIVR                 | No    | 1329.777                   | IPI00623845.3 |
| LNPNFLVDFGKEPLGPALAEHLR        | No    | 2546.354                   | IPI00623845.3 |
| Q(-17.0265)YDISNPQKPR          | No    | 1344.668                   | IPI00623845.3 |
| SPQYSQVIHR                     | No    | 1213.62                    | IPI00623845.3 |
| APQVSTPTLVEAAR                 | No    | 1438.778                   | IPI00131695.3 |
| DVFLGTFLYEYSR                  | No    | 1608.782                   | IPI00131695.3 |
| GLVLIAFSQYLQK                  | No    | 1478.839                   | IPI00131695.3 |
| LGEYGFQNAILVR                  | No    | 1478.788                   | IPI00131695.3 |
| RHPDYSVSLLLR                   | No    | 1454.799                   | IPI00131695.3 |
| NQTAEKEEFHQK                   | No    | 1744.78                    | IPI00208205.1 |
| QTQTFTTYSNQPGLIQVYEGER         | No    | 2773.319                   | IPI00208205.1 |
| SQIHDIVLVGGSTR                 | No    | 1480.8                     | IPI00208205.1 |
| STAGDTHLGGEDFDNR               | No    | 1690.718                   | IPI00208205.1 |
| TVTNAVVTVPAYFNDSQR             | No    | 1980.99                    | IPI00208205.1 |
| DLGEAALNEYLR                   | No    | 1362.678                   | IPI00153317.3 |
| DTNHGPNHEAHLR                  | No    | 1624.745                   | IPI00153317.3 |
| HGSIIYHPSLLPR                  | No    | 1488.82                    | IPI00153317.3 |
| PGFFFQPTVFTDVEDHM(15.9949)YIAK | No    | 2488.166                   | IPI00153317.3 |
| RPQPEEGATYEGIQK                | No    | 1701.821                   | IPI00153317.3 |
| AGPWTPEAAVEHPEAVR              | No    | 1815.89                    | IPI00130950.1 |
| EATTEQQLR                      | No    | 1074.531                   | IPI00130950.1 |
| EAYNLGVR                       | No    | 920.4716                   | IPI00130950.1 |
| QGFIDLPEFPFGLR                 | No    | 1860.941                   | IPI00130950.1 |
| DIVYIGLR                       | No    | 947.544                    | IPI00117914.3 |
| LKETEYDVR                      | No    | 1151.571                   | IPI00117914.3 |
| VM(15.9949)EETFSYLLGR          | No    | 1443.707                   | IPI00117914.3 |
| VSVVLGGDHS LAVGSISGHAR         | No    | 2017.07                    | IPI00117914.3 |
| IGGHGAEYGAELER                 | No    | 1528.727                   | IPI00110658.1 |
| LRVDPVNFK                      | No    | 1086.608                   | IPI00110658.1 |
| M(15.9949)FASFPTTK             | No    | 1028.489                   | IPI00110658.1 |
| TYFPHFDVSHGSAQVK               | No    | 1818.858                   | IPI00110658.1 |
| FPGQLNADLR                     | No    | 1129.588                   | IPI00109061.1 |
| GHYTEGAELVDSVLDVVR             | No    | 1957.974                   | IPI00109061.1 |
| IREEYPDR                       | No    | 1076.525                   | IPI00109061.1 |
| EQAGGDATENFEDVGHSTDR           | No    | 2204.92                    | IPI00230113.5 |
| FLEEHPGGEEVLR                  | No    | 1510.742                   | IPI00230113.5 |

| Peptide                 | Decoy | Mass of unmodified peptide | Protein       |
|-------------------------|-------|----------------------------|---------------|
| TYIIGELHPDDR            | No    | 1427.704                   | IPI00230113.5 |
| DVLFPGYTHLQR            | No    | 1444.746                   | IPI00314788.5 |
| INVLPLGSGAIAGNPLGVDR    | No    | 1932.079                   | IPI00314788.5 |
| LHPNDEDIHTANER          | No    | 1659.76                    | IPI00314788.5 |
| TEQGPQVDETQFK           | No    | 1505.689                   | IPI00197770.1 |
| TFVQEDVYDEFVER          | No    | 1774.805                   | IPI00197770.1 |
| VVGNPFDSR               | No    | 989.493                    | IPI00197770.1 |
| HNFTPLAR                | No    | 954.5036                   | IPI00201413.1 |
| ITAHLVHELK              | No    | 1187.677                   | IPI00201413.1 |
| YALQSQR                 | No    | 992.504                    | IPI00201413.1 |
| HGGTIPVVPTAEFQDR        | No    | 1722.869                   | IPI00114209.1 |
| IIEGANGPTTPEADKIFLER    | No    | 2241.153                   | IPI00114209.1 |
| NLNHVSYGR               | No    | 1058.526                   | IPI00114209.1 |
| DNIQGITKPAIR            | No    | 1324.735                   | IPI00231340.8 |
| VFLENVIR                | No    | 988.5706                   | IPI00231340.8 |
| EAYPGDVVYLFHSR          | No    | 1552.731                   | IPI00130280.1 |
| TGAIVDVPVGEELLGR        | No    | 1623.883                   | IPI00130280.1 |
| FAVELEGEQPISVPPSTNHTVYR | No    | 2569.281                   | IPI00405699.2 |
| STGSVVGQQPFGGAR         | No    | 1446.722                   | IPI00405699.2 |
| EKIEDNGNFR              | No    | 1220.568                   | IPI00466399.1 |
| LFLEQIHVLENSLVK         | No    | 1894.082                   | IPI00466399.1 |
| EGHPVTSEPSRPEPAVFK      | No    | 1962.969                   | IPI00223216.5 |
| YLGTQPEPDIVGLDSGHIR     | No    | 2066.043                   | IPI00223216.5 |
| DSQGNLFR                | No    | 935.4461                   | IPI00127206.6 |
| ELSEIAQR                | No    | 944.4929                   | IPI00127206.6 |
| AEELGLPILGVLR           | No    | 1378.818                   | IPI00121833.3 |
| IAQFLSGIPETVPLSTVNR     | No    | 2041.121                   | IPI00121833.3 |
| AAVQVAALPR              | No    | 1058.587                   | IPI00130640.5 |
| APAAIGPYSQAVQVDR        | No    | 1641.847                   | IPI00130640.5 |
| DILQDVLADLSNEAFPSTHQLVR | No    | 2842.413                   | IPI00136213.5 |
| FHHS�TDHTR              | No    | 1249.595                   | IPI00136213.5 |
| AHPLFTFLR               | No    | 1100.613                   | IPI00192301.2 |
| YVRPGGGFEPNFTLFEK       | No    | 1956.962                   | IPI00192301.2 |
| FEDGDLTYQSNAILR         | No    | 1853.916                   | IPI00231229.9 |
| PPYTIVYFPVR             | No    | 1350.733                   | IPI00231229.9 |
| HHLDTGETEER             | No    | 1350.58                    | IPI00230212.5 |
| KHHLDTGETEER            | No    | 1478.664                   | IPI00230212.5 |
| GKPDVVVKEDEEYKR         | No    | 1789.888                   | IPI00154054.1 |
| Q(-17.0265)EQDTYALSSYTR | No    | 1560.705                   | IPI00154054.1 |
| HIDGAYVYHNEHEVGEAIR     | No    | 2208.035                   | IPI00122657.1 |
| SLGVSNFNR               | No    | 992.504                    | IPI00122657.1 |
| LISWYDNEYGYSNR          | No    | 1778.79                    | IPI00554039.1 |
| LVNNGKPITIFQER          | No    | 1627.894                   | IPI00554039.1 |
| KFLQPGSQR               | No    | 1059.572                   | IPI00116055.6 |
| SHGQDYLVGNR             | No    | 1244.59                    | IPI00116055.6 |



| Peptide                       | Decoy | Mass of unmodified peptide | Protein           |
|-------------------------------|-------|----------------------------|-------------------|
| FYGPEGPYGVFAGR                | No    | 1515.714                   | IPI00319973.3     |
| KFYGPEGPYGVFAGR               | No    | 1643.799                   | IPI00319973.3     |
| FHHTIGGSR                     | No    | 1010.505                   | IPI00231445.5     |
| GATYGKPVHHGVNQLK              | No    | 1704.884                   | IPI00231445.5     |
| GAYPVFFNFTR                   | No    | 1317.651                   | IPI00308328.3     |
| ILEEGSFLEVLRL                 | No    | 1516.85                    | IPI00308328.3     |
| GGPLSGPYR                     | No    | 902.461                    | IPI00221890.6     |
| VVFDDTYDR                     | No    | 1128.509                   | IPI00221890.6     |
| GFFVQPTVFSNVTDEM(15.9949)R    | No    | 1972.935                   | IPI00626662.3     |
| IHGQTIPSDGDIFTYTR             | No    | 1919.938                   | IPI00626662.3     |
| FAFQAEVNR                     | No    | 1080.535                   | IPI00129526.1     |
| KPEEVDDEVFYSR                 | No    | 1708.783                   | IPI00116603.1     |
| NAVTVQEGFPVPDTR               | No    | 1600.784                   | IPI00116074.1     |
| QASGGPVDIGPEYQQDLDR           | No    | 2043.95                    | IPI00125460.1     |
| HAYGDQYR                      | No    | 1008.441                   | IPI00135231.2     |
| GFVVQGSTGEFPFLTSR             | No    | 2070.042                   | IPI00560967.1     |
| HEYQANGPEDLNR                 | No    | 1541.686                   | IPI00127942.4     |
| HGRPGIGATHSSR                 | No    | 1331.681                   | IPI00231692.5     |
| AAATFNPELITHILDGSPENTR        | No    | 2366.186                   | IPI00409360.3     |
| GENLSLVHGPDIR                 | No    | 1561.821                   | IPI00753038.1     |
| FVEGLPINDFSR                  | No    | 1392.704                   | IPI00198717.8     |
| FTPGTFTNQIAAFR                | No    | 1697.852                   | IPI00123604.4     |
| GAGVKGPPASTSR                 | No    | 1183.62                    | IPI00387452.1     |
| GAM(15.9949)KGLGTDEDTLIEILTTR | No    | 2133.088                   | IPI00230395.5     |
| ADHGEPIGR                     | No    | 950.457                    | IPI00229080.7     |
| IQTQPGYANTLR                  | No    | 1360.71                    | IPI00124771.1     |
| INEAFDLLR                     | No    | 1089.582                   | IPI00221400.5     |
| IYHTIAYLTPLPQPNR              | No    | 1896.026                   | IPI00230889.5     |
| AGLQFPVGR                     | No    | 943.524                    | IPI00153400.2     |
| KANGTVVDSGFDPQSRQLNLPPIAPK    | Yes   | 2849.481                   | IPI:IPI00664248.3 |
| IISQEILNLIELR                 | No    | 1552.919                   | IPI00323496.5     |
| HQGSLSLFPDHSVK                | No    | 1713.836                   | IPI00133456.1     |
| HGVYNPNK                      | No    | 927.4453                   | IPI00197696.2     |
| HYNGEAYEDDEHHR                | No    | 1867.75                    | IPI00132208.1     |
| IGHHSTSDSSAYR                 | No    | 1531.665                   | IPI00331555.2     |
| IFFYDAENPPGSEVLR              | No    | 1852.899                   | IPI00317356.10    |
| FALDGGFFSTIR                  | No    | 1272.65                    | IPI00115599.6     |
| ALLELQLEPEELYQTFQR            | No    | 2219.148                   | IPI00203214.6     |
| ALHGEQYLELYKPLPR              | No    | 1926.025                   | IPI00331628.5     |
| APLVLEQGLR                    | No    | 1094.645                   | IPI00210444.5     |
| AQFGQPEILLGTIPGAGGTQR         | No    | 2110.117                   | IPI00207217.1     |
| AQELAQRKQEQR                  | No    | 1596.859                   | IPI00468895.2     |
| ALETASQDFSLDLR                | No    | 1564.773                   | IPI00108982.1     |
| AGVPPGVINIVFGTGPR             | No    | 1649.925                   | IPI00267407.1     |
| AFEEEEQALR                    | No    | 1091.525                   | IPI00211507.3     |

| Peptide                                        | Decoy | Mass of unmodified peptide | Protein       |
|------------------------------------------------|-------|----------------------------|---------------|
| AHHDLGIFYGSSYVAAPDGSR                          | No    | 2269.018                   | IPI00121639.1 |
| ALESPERPFLAILGGAK                              | No    | 1767.978                   | IPI00231426.6 |
| AISFVGSNQAGEYIFER                              | No    | 1886.916                   | IPI00205018.2 |
| ELNDFISYLQR                                    | No    | 1396.699                   | IPI00230108.6 |
| EADNPGILHPFGSVPPFGYGV                          | No    | 2228.101                   | IPI00119685.1 |
| EVSVFGAVSELFTR                                 | No    | 1539.793                   | IPI00127625.1 |
| FAGPYDKGEYSPVQK                                | No    | 1771.82                    | IPI00223367.5 |
| AEAVQSFLAFIQHLR                                | No    | 1728.931                   | IPI00212316.1 |
| DVNQQEFVR                                      | No    | 1133.546                   | IPI00113241.7 |
| AVIGDHGDEIFSVFGSPFLK                           | No    | 2134.062                   | IPI00387289.3 |
| ASGGGVPTDEEQATGLER                             | No    | 1772.818                   | IPI00116154.2 |
| DFIDYFLIQR                                     | No    | 1328.676                   | IPI00114781.1 |
| DLGTQLAPIIQEFFHSEQYR                           | No    | 2391.186                   | IPI00339188.2 |
| DFVENVTSGNAVDFFPVLR                            | No    | 2125.048                   | IPI00128287.1 |
| KSSLSLDSLKR                                    | Yes   | 1232.687                   | IPI00368909.3 |
| TSYAQHQQVR                                     | No    | 1216.595                   | IPI00231693.5 |
| TLIEFLLR                                       | No    | 1003.607                   | IPI00331436.4 |
| TTPDVIVFVGFGR                                  | No    | 1397.734                   | IPI00214654.1 |
| VAAFDLDGVLALPSIAGAFR                           | No    | 2002.089                   | IPI00321617.1 |
| TVLGVPEVLLGILPGAGGTQR                          | No    | 2046.184                   | IPI00212622.2 |
| TATPQQAQEVHEK                                  | No    | 1465.705                   | IPI00231767.5 |
| SLRPGVAIADFVIFPPR                              | No    | 1854.051                   | IPI00114330.3 |
| SGYQQAASEHGLVVIAPDTSPR                         | No    | 2282.129                   | IPI00109142.4 |
| SSGSPYGGGYGSGGGSGGYGSR                         | No    | 1909.783                   | IPI00269661.1 |
| SSQQEHKR                                       | Yes   | 998.4786                   | IPI00206433.3 |
| SSPKKPR                                        | No    | 798.4494                   | IPI00226378.1 |
| VAGHPDVVINNAAGNFISPSE                          | No    | 2263.134                   | IPI00213659.3 |
| DFDPAINEYIQR/DFDPAINEYLQR                      | No    | 1479.699                   | IPI00228630.5 |
| YYVTIIDAPGHR                                   | No    | 1403.72                    | IPI00195372.1 |
| IQDKEGIPPDQQR/IQDKEGLPPDQQR                    | No    | 1522.763                   | IPI00138892.2 |
| YTDQSGEEEEEDYESEEQIQHR/YTDQSGEEEEEDYESEE QLQHR | No    | 2600.042                   | IPI00169862.1 |
| SLGVAAEGIPDQYADGEAAR/SLGVAAEGLPDQYAD GEAAR     | No    | 1988.944                   | IPI00231648.5 |
| YTPPPHHSGR                                     | No    | 1147.552                   | IPI00117300.3 |
| VIHDNFGIVKGLM(15.9949)TTVHAITATQK              | No    | 2593.384                   | IPI00462605.5 |
| VDATEESDLAQYGV                                 | No    | 1779.827                   | IPI00122815.3 |
| VTHAVVTVPAYFNDAQR                              | No    | 1886.964                   | IPI00206624.1 |
| YQLQSQENFEPFM(15.9949)K                        | No    | 1787.808                   | IPI00120451.1 |
| YLDEDTVYHLQPSGR                                | No    | 1791.843                   | IPI00128518.1 |
| SEDYAFPTYADR                                   | No    | 1433.61                    | IPI00117978.1 |
| LPIFIADAFTATAFR                                | No    | 1652.893                   | IPI00110528.1 |
| LLYDLADQLHAAVGASR                              | No    | 1811.953                   | IPI00116753.4 |
| LVQAFQFTDK                                     | No    | 1195.613                   | IPI00121788.1 |
| MAELNSAASEMPFNLR                               | No    | 1779.828                   | IPI00127317.1 |
| LVQDVANNTNEEAGDGTATVLR                         | No    | 2559.241                   | IPI00308885.6 |

| Peptide                      | Decoy | Mass of unmodified peptide | Protein       |
|------------------------------|-------|----------------------------|---------------|
| LLVPYLIEAVR                  | No    | 1284.781                   | IPI00121105.2 |
| LFDHPEVPTPPESASVSR           | No    | 1963.964                   | IPI00113223.2 |
| KTDGVYDPVEYEKYPYR            | No    | 2086.963                   | IPI00387491.1 |
| LISQIVSSITASLR               | No    | 1486.872                   | IPI00117348.4 |
| LLGQFTLIGIPPAPR              | No    | 1591.945                   | IPI00133903.1 |
| LKQEYFVVAATLQDVIR            | No    | 1992.094                   | IPI00190179.3 |
| M(15.9949)VNVFLGIPFAQAPLGPLR | No    | 2039.139                   | IPI00381178.3 |
| QQKWLLFAC(57.0215)ETALGR     | Yes   | 1819.93                    | IPI00849514.1 |
| QLLPM(15.9949)QVTQHAK        | No    | 1392.744                   | IPI00370138.4 |
| RDLPVDPDR                    | No    | 966.5246                   | IPI00763061.1 |
| RLAVSVLREIR                  | No    | 1310.815                   | IPI00222072.1 |
| RGDGTMGPPGR                  | Yes   | 1002.466                   | IPI00650051.1 |
| Q(-17.0265)ATVGDVNTDRPGLLDLK | No    | 1910.995                   | IPI00222430.5 |
| NIIVFYGSQTGTAEEFANR          | No    | 2116.022                   | IPI00231200.5 |
| NFLASQVPFPSR                 | No    | 1361.709                   | IPI00231253.5 |
| NKPEDYQGGR                   | No    | 1162.526                   | IPI00222496.3 |
| PGGLLGDEAPNFEANTTIGR         | No    | 2141.075                   | IPI00555059.2 |
| NVVGDHADDVYSVFGAPILR         | No    | 2143.07                    | IPI00128399.3 |
